# Supplementary material for: Anti-Cholinesterase Activity of Lycopodium Alkaloids from Vietnamese Huperzia squarrosa (Forst.) Trevis
Source: PubMed Central journal article supplement (PMC6271335; doi:10.3390/molecules191119172), 2014-11-19

# Supplementary Information

Figure S1. <sup>1</sup>H-NMR spectrum of compound 1.

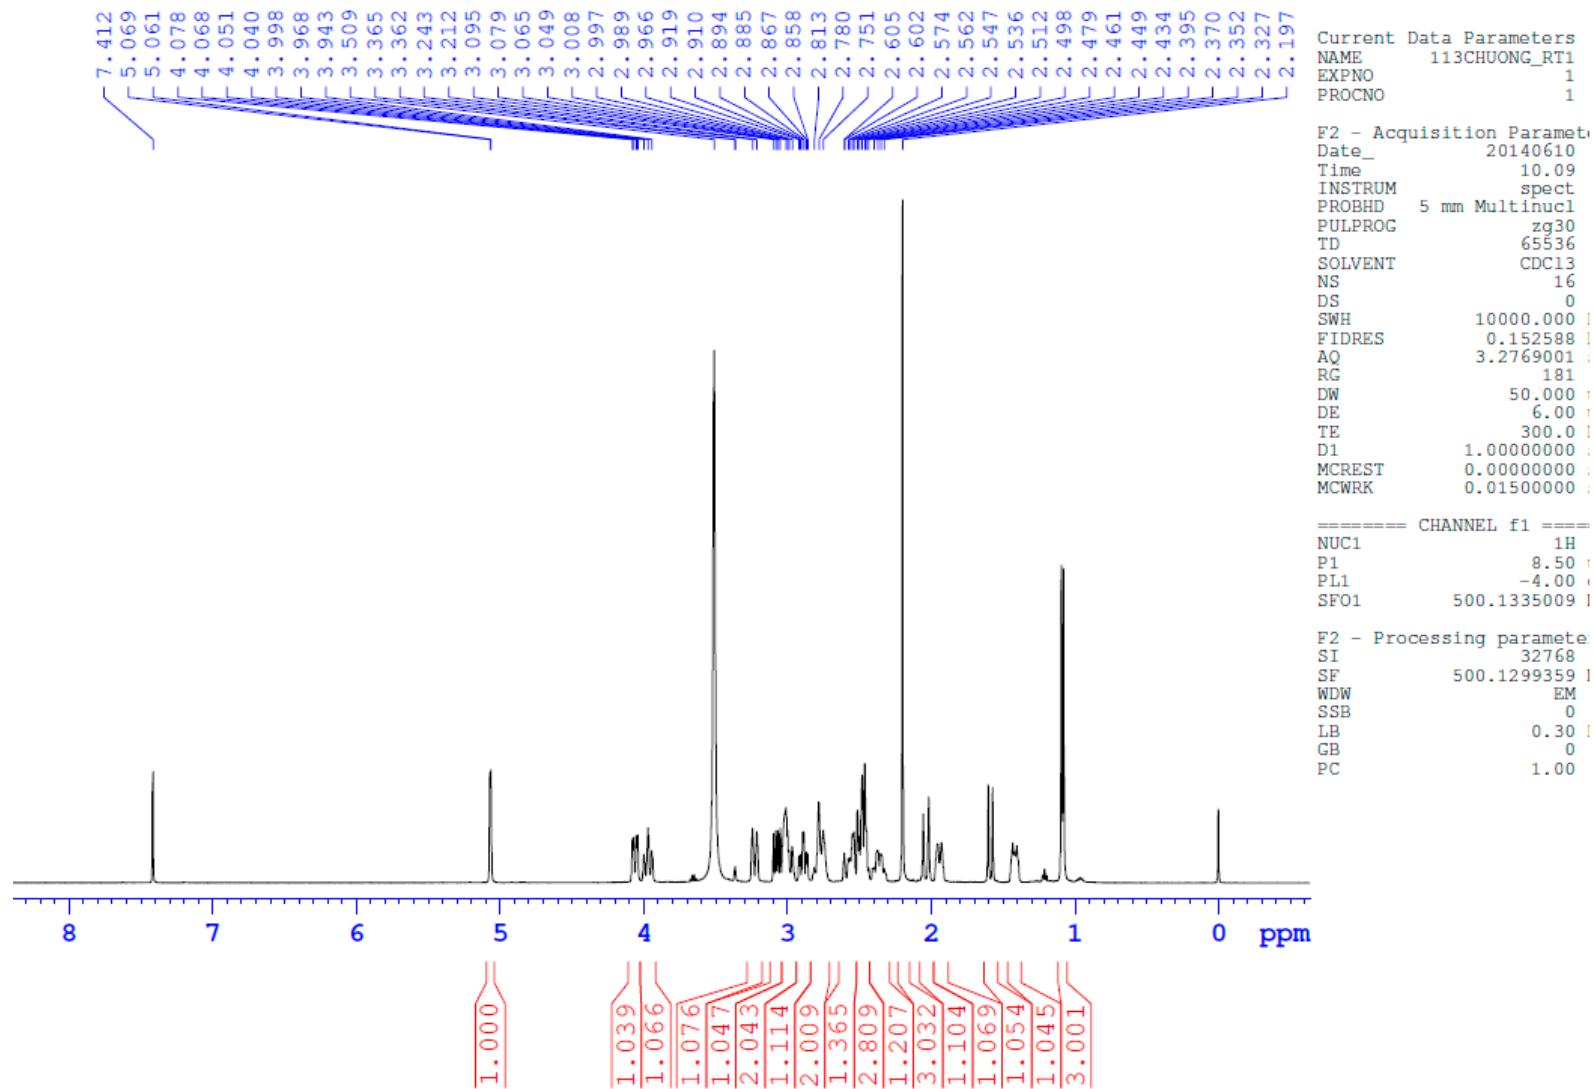

Figure S2.  $^{13}\text{C}$ -NMR spectrum of compound 1.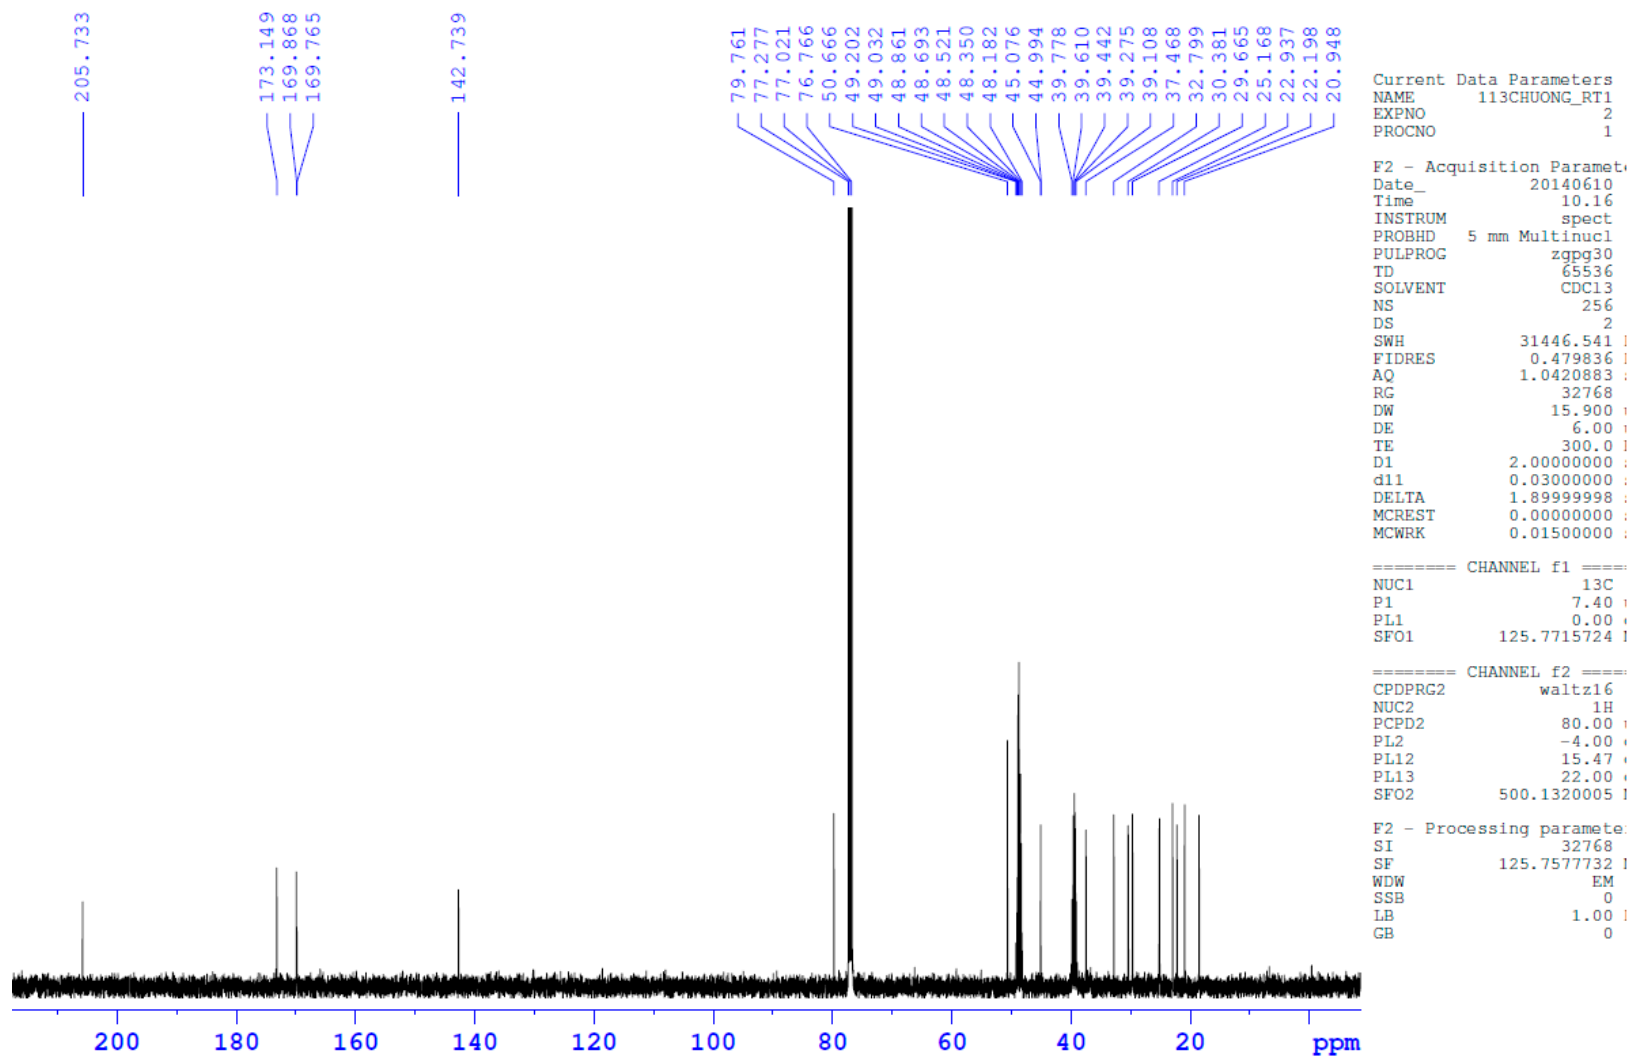

Figure S3. HMQC spectrum of compound 1.

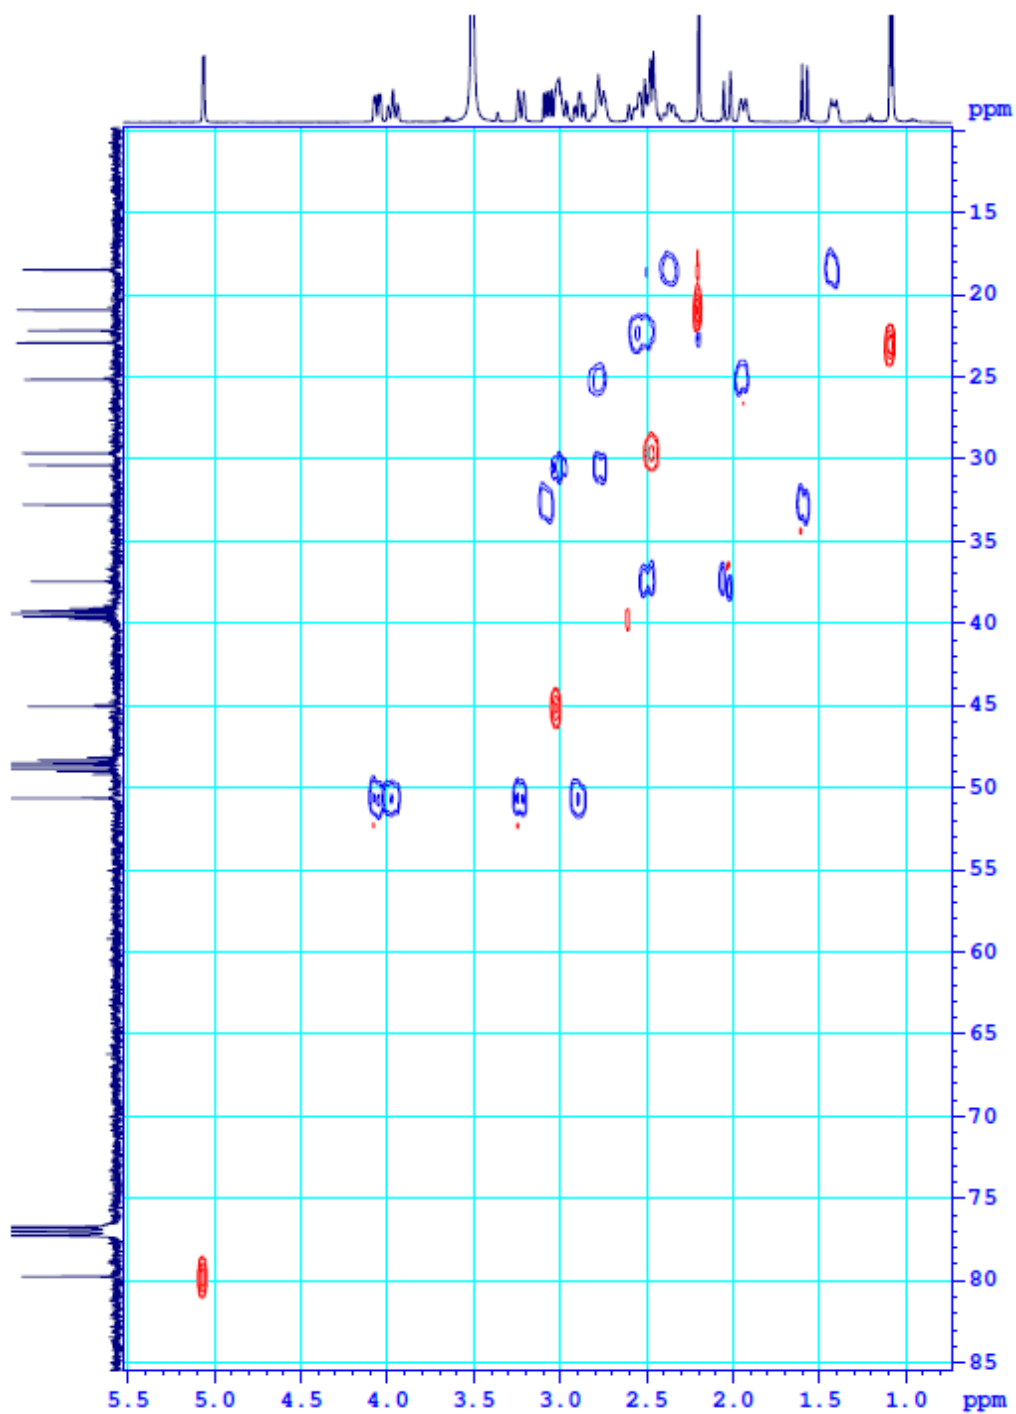

Figure S4. HMBC spectrum of compound 1.

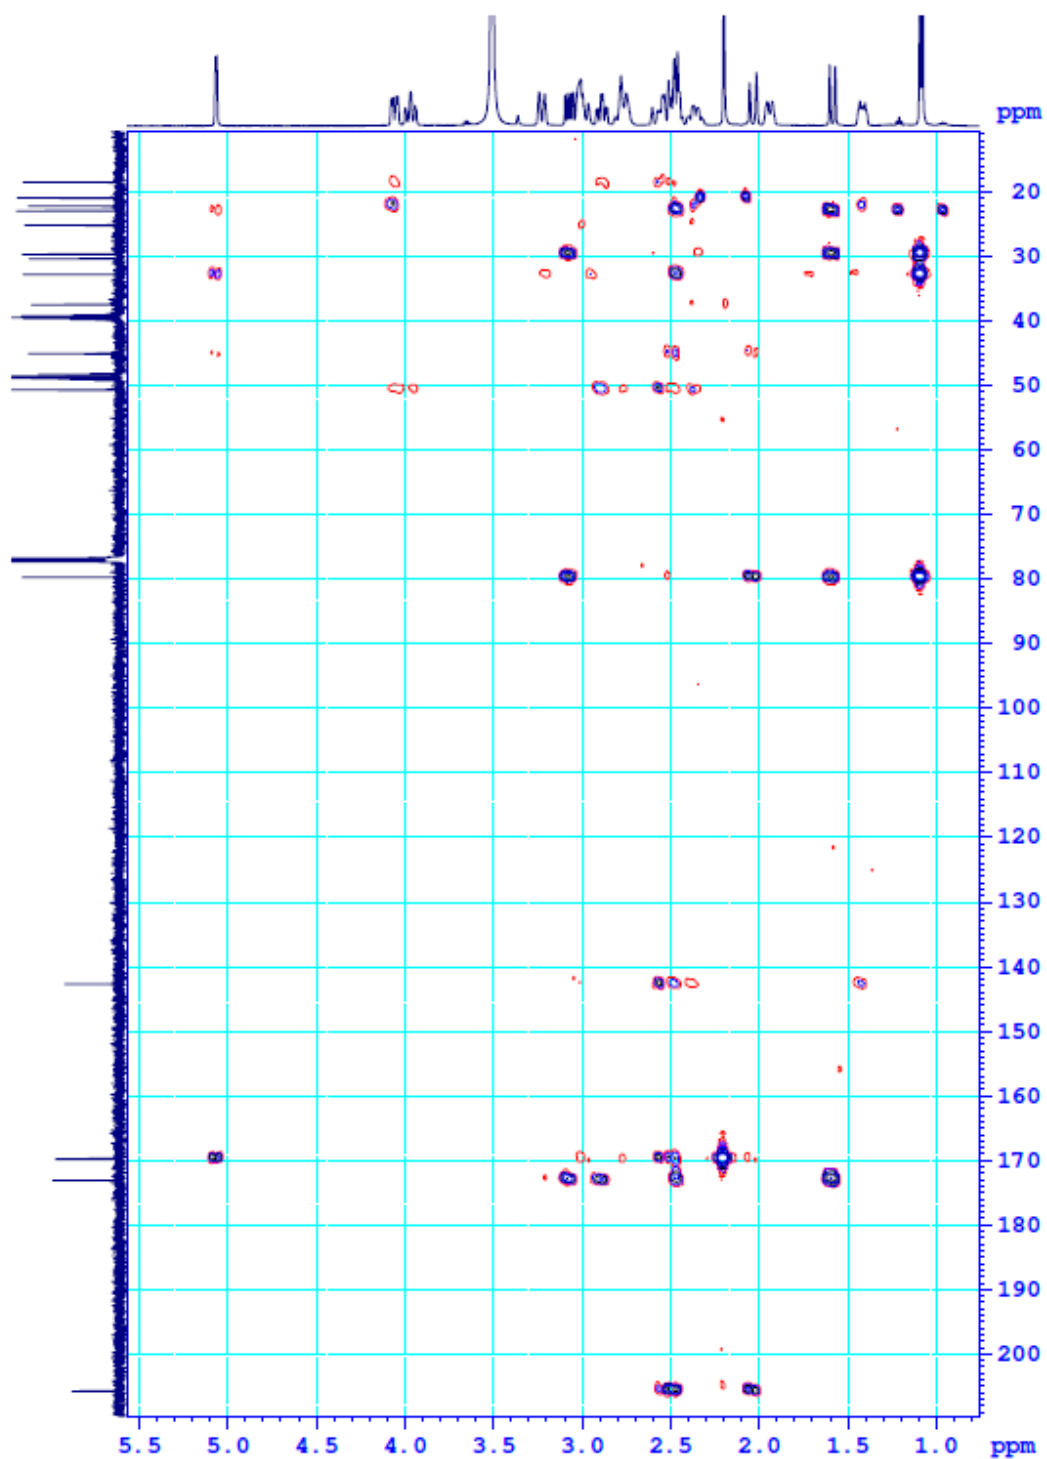

Figure S5. COSY spectrum of compound 1.

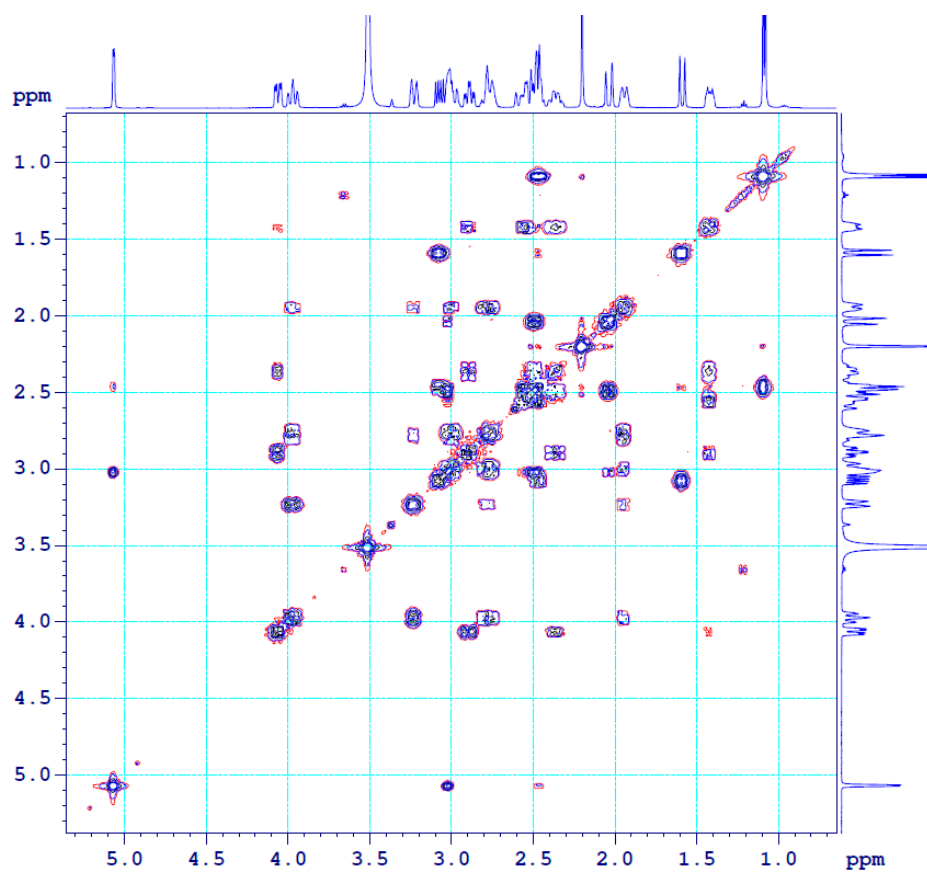

Figure S6. ROESY spectrum of compound 1.

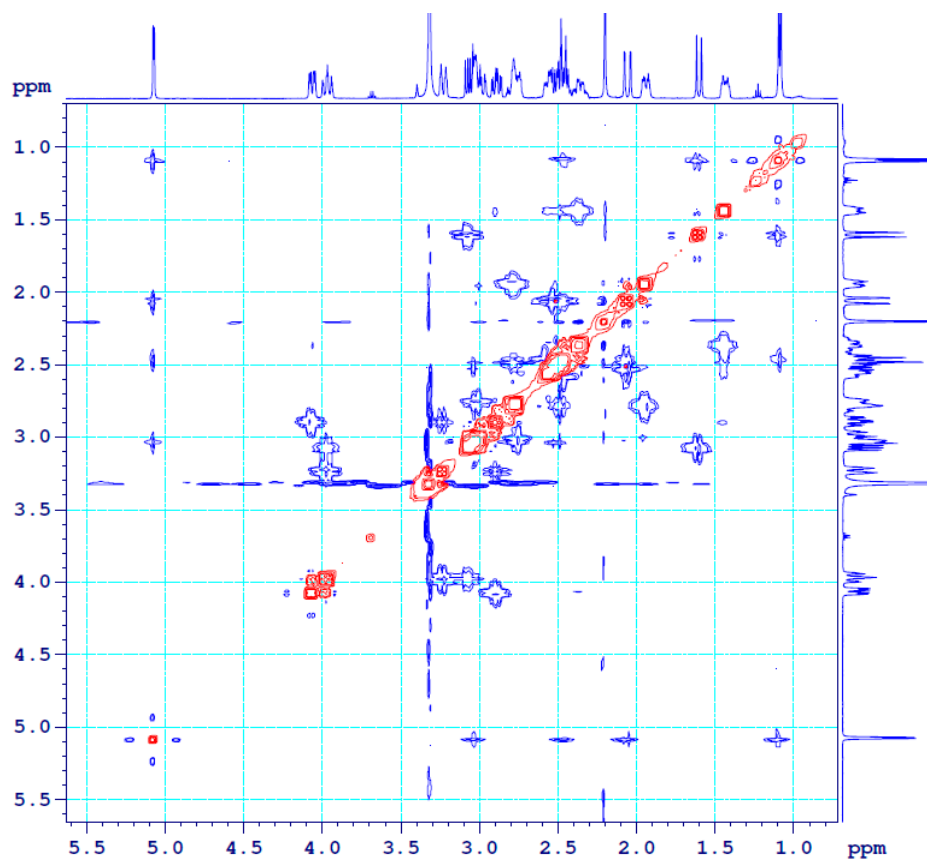

Figure S7. HRESIMS of compound 1.

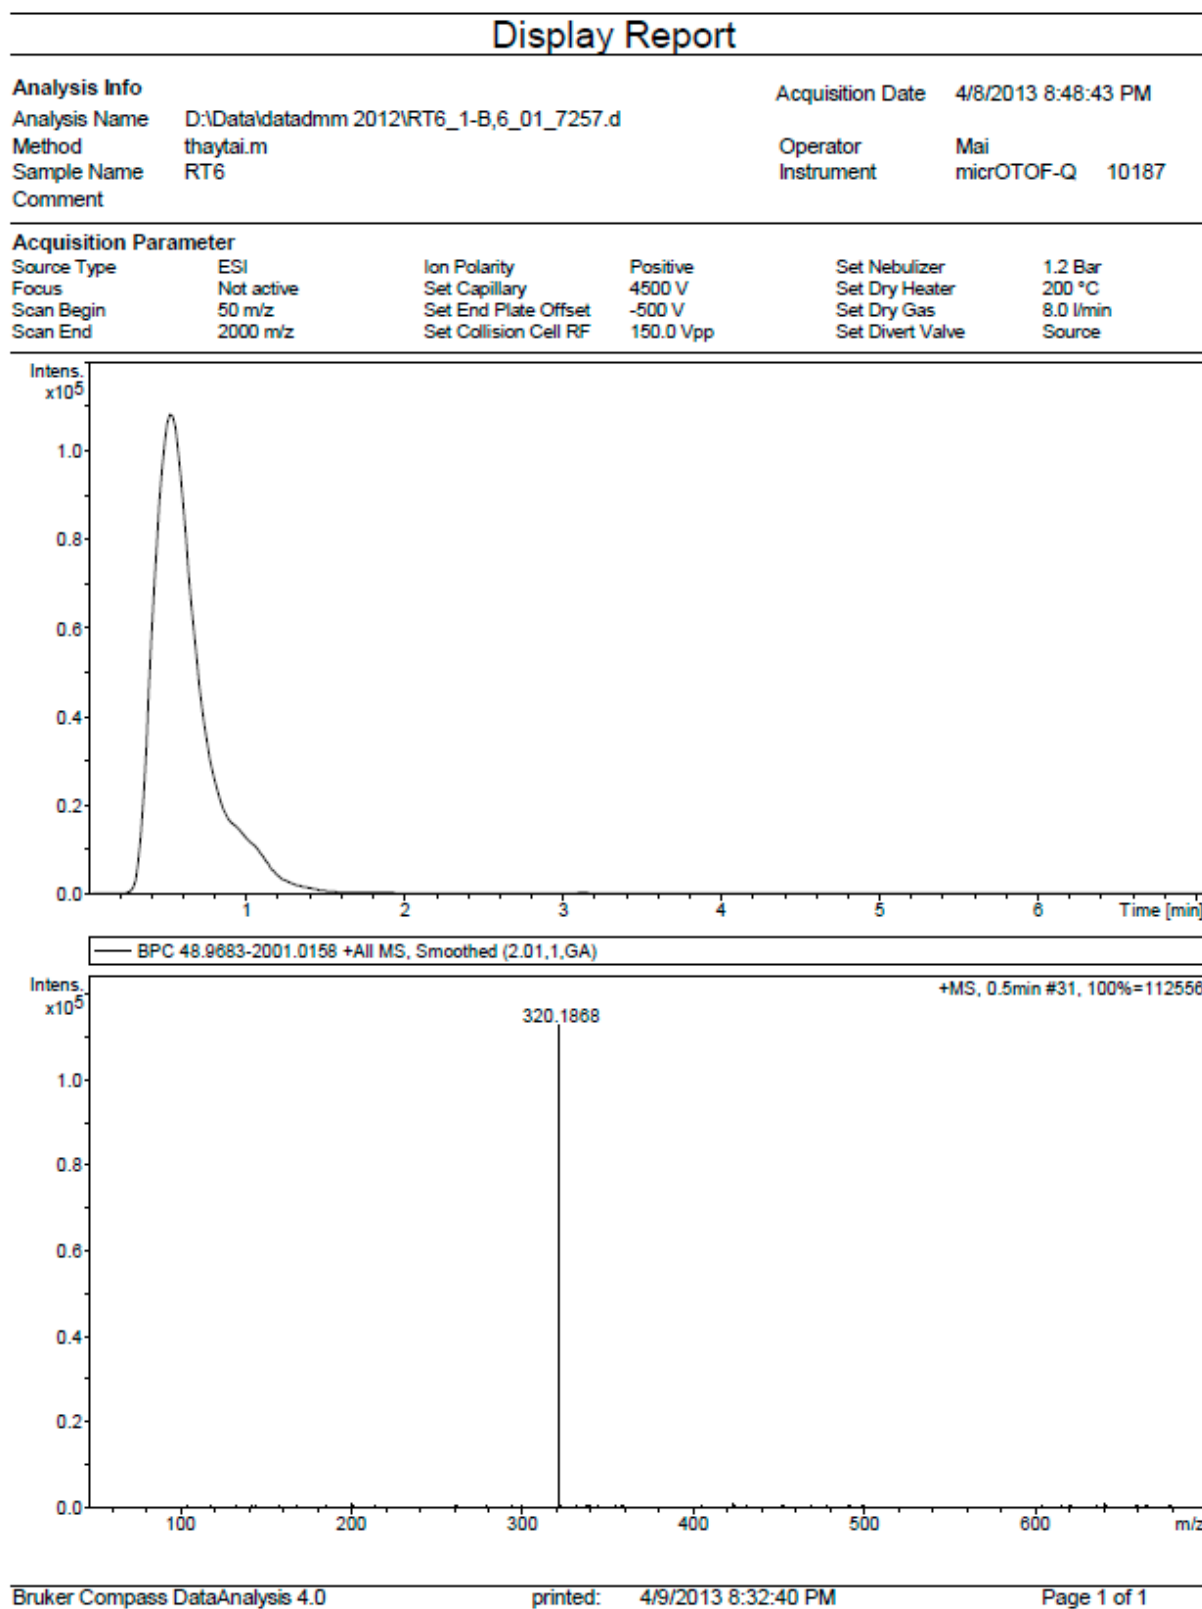

Supplement: molecules-19-19172-s001.pdf [file molecules-19-19172-s001.pdf]
